# Supplementary material for: Genomic Analysis of AZD1222 (ChAdOx1) Vaccine Breakthrough Infections in the City of Mumbai
Source: Int J Clin Pract. 2022 Feb 11;2022:2449068. doi: 10.1155/2022/2449068 (PMC9159196; doi:10.1155/2022/2449068)
Supplement: Supplementary Materials — Supplementary Table 1: details along with GISAID ID of all sequenced SARS-CoV-2 genomes in this study. Supplementary Table 2: distribution of severe COVID-19 among the unvaccinated (n = 92) patients according to clinical and genomic variables (continuous variables were dichotomized based on the median value in the entire cohort). Supplementary Table 3: distribution of severe COVID-19 among the vaccinated (n = 67) patients according to clinical and genomic variables (continuous variables were dichotomized based on the median value in the entire cohort). [file 2449068.f1.zip]

Archive with 3 entries (3 files):
- 2449068.f1/Supplementary Table 1.docx
- 2449068.f1/Supplementary Table 2.docx
- 2449068.f1/Supplementary Table 3.docx
